# Supplementary material
Source: Research Square preprint supplement (doi:10.21203/rs.3.rs-10281038/v1)
Supplement: Supplementary file 1 [file 86779e07e2cc0ec5a15d9b5e.xlsx]

## Sheet: Front Page
Archives of Toxicology
Supplementary Material for
Human Myeloperoxidase-Driven Activation of Skin Sensitizing p-Phenylenediamine-related Aromatic Diamines and Phenylpropanoids – Insights from In Chemico and In Silico Approaches
Hannah Deusinger1,2 · Philipp Peslalz2 · Karma C. Fussell2 · Sabine Langhoff2 · Udo Bock3 · Carsten Goebel4 · Brunhilde Blömeke1
Affiliations:
1	Department of Environmental Toxicology, Trier University, Trier, Germany
2	Wella Company, Darmstadt, Germany
3	Department of Environmental Toxicology, Analytical and Ecological Chemistry, Trier University, Trier, Germany
4	Wella Company, BBCG Toxicology & Safety Science Consulting GbR, Mörfelden-Walldorf, Germany
Corresponding Author:
Brunhilde Blömeke; E-Mail address: bloemeke@uni-trier.de

## Sheet: Supplementary Table S1
Table S1 List of chemicals and enzymes used, including supplier details, batch numbers, and corresponding purity or specific activity values
Chemical Name / Product Name	Supplier	Catalog Code	Batch	Cas-No.	Note
Myeloperoxidase from Human Leukocytes	Sigma Aldrich	M6908	SLCN3928	9003-99-0	Spectific Activity: 710 U/mg
			SLCR2927	9003-99-0	Specific Activity: 1040 U/mg
			0000392798	9003-99-0	Specific Activity: 800 U/mg
			0000420551	9003-99-0	Specific Activity: 420 U/mg
Myeloperoxidase, Human Polymorphonuclear Leukocytes	Sigma Aldrich	475911	4275607	9003-99-0	Specific Activity: 200 U/mg
Catalase Suspension from Bovine Liver	Sigma	C1345	SLCJ5891	9001-05-2	Specific Activity: 3488 U/mg
1,4-Diamino-Benzene	Lowenstein	GCAS: 95729910/95354620	7213030549/Supplier Batch: L61389 Lowenstein	106-50-3	Purity: 99.7%
2-Methoxymethyl-Benzene-1,4-Diamine	HDC - Huenfeld	WR804025	20090312-2	337906-36-2	Purity: 99.9%
1,4-Diamino-2-Methyl-Benzene-Sulfate	Dragon	GCAS95354561	7213254507	615-50-9	Purity: 97%
Eugenol	Alfa Aesar	A14332	10230789	97-53-0	Purity: 99.5%
2-Methoxy-4-Propyl-Phenol (Dihydroeugenol)	Sigma	W359807	SBHN6616	2785-87-7	Purity: 100%
Cinnamic Alcohol	Sigma	108197	STBK0614	104-54-1	Purity: 99.6%
Hydrogen Peroxide	(in-house)	-	213002002287L-003	7722-84-1	Purity: 49.9%
Monopotassium Phosphate	Sigma	P5379	BCCF3888	7778-77-0	Purity: ≥99.0%
Ammonium Formate	Sigma-Aldrich	70221	BCCC3106	540-69-2	LC-MS Grade
Formic Acid	Honeywell	F0507		64-18-6	LC-MS Grade
Potassium Hydroxide	Merck	1.05033.1000		1310-58-3	Purity: ≥85%
Methanol	J.T. Baker	8402		67-56-1	HPLC Grade
	Merck	1.06035		67-56-1	MS Grade
Acetonitrile	Merck	1.0003		75-05-8	HPLC Grade
	Merck	1.00029		75-05-8	MS Grade
2-Propanol	VWR	20922.4		67-63-0	Technical Grade

## Sheet: Supplementary Table S2
Table S2 HPLC-HR-MS analysis of parent substances eugenol, dihydroeugenol, p-phenylenediamine (PPD), toluene-2,5-diamine (PTD) and 2-methoxymethyl-PPD (ME-PPD) and their Myeloperoxidase-derived metabolites. Shown are retention times (Rt), measured m/z with the ion species [M+H]+, sum formulas, mass errors (ppm), isotopic fit (i-FIT, %), predicted fragment intensity (%) and fragment match counts s…
Chemical Name / Annotated MPO-derived Species	Postulated Structure	Rt [min]	m/z [M+H]+	Sum Formula	Mass Error [ppm]	i-FIT [%]c	Predicted Intensity [%]d	Fragment Matchese
Eugenol - 2H	#VALUE!	3.73	163.075	C10H10O2	-1.1	1	0.57	8
Eugenol Dimer - 2 H	#VALUE!	5.35	325.143	C20H18O4	-0.4	1	0.68	7
Eugenol	#VALUE!	6.57	165.09	C10H12O2	-5.3	1	0.68	18
Eugenol Dimer	#VALUE!	8.7	327.158	C20H20O4	-2.7	1	0.79	16
Dihydroeugenol - 2H	#VALUE!	4.16	165.091	C10H12O2	-2	1	0.66	13
Dihydroeugenol	#VALUE!	7.16	167.106	C10H10O2	-5	1	0.87	23
Dihydroeugenol Dimer - 2 H	#VALUE!	7.8	329.174	C20H24O4	-2.3	1	0.72	27
Dihydroeugenol Dimer	#VALUE!	9.38	331.19	C20H26O4	-1.5	1	0.13	4
PPD	#VALUE!	3.97	109.075	C6H8N2	7.5b	1	0.06	3
PPD Trimer - 2H (Bandrowski's Base)	#VALUE!	10.2	319.166	C18H18N6	-1.5	0.93	0.71	16
PTD Monomer - NH3 + 2O	#VALUE!	3.84	138.055	C7H7NO2	-0.1	0.97	0.83	1
PTDa	#VALUE!	4.04	122.084	C7H10N2	0.1	1	0.14	5
PTD Dimer - 2H - NH + O	#VALUE!	6.87	242.127	C14H15N3O	-5.6	0.86	0.54	10
PTD Dimer - 2H - NH + O	#VALUE!	7.43	242.128	C14H15N3O	-2.2	0.77	0.61	17
PTD Dimer - 4Hf	#VALUE!	8.79	239.129	C14H14N4	0.2	0.85	0.25	2
	#VALUE!
PTD Trimer - 4H - NH + O	#VALUE!	8.93	360.181	C21H21N5O	-1.8	0.93	0.17	8
	#VALUE!
PTD Trimer - 4H - 2NH + 2O	#VALUE!	10.05	361.165	C21H20N4O2	-1.5	0.72	0.36	12
PTD Dimer - 2H - 2NH + O	#VALUE!	10.11	227.116	C14H14N2O	-6.9	0.94	0.91	5
PTD Dimer - 2H - 2NH + O	#VALUE!	10.61	227.116	C14H14N2O	-7.2	0.01	0.79	3
ME-PPD Monomer - NH3 + 2O	#VALUE!	4.16	168.065	C8H9NO3	1.4	0.92	0.53	8
ME-PPDa	#VALUE!	4.32	152.094	C8H12N2O	-3.9	1	0.67	12
ME-PPD Trimer - 4H - NH + O	#VALUE!	8.67	450.213	C24H27N5O4	-1	0.57	0.59	10
	#VALUE!
a: ion species [M] was only found. Analysis of respective standard revealed the predominance of this ion species.
b: Analysis of standard also leads to high mass errors.
c: i-FIT (%) indicates the agreement between the measured and theoretical isotopic distribution, including mass shift. Higher values reflect better isotopic fit and formula confidence.
d: Predicted intensity (%) represents the match between observed fragment intensities and the theoretical fragmentation pattern. Higher percentages indicate stronger concordance.
e: Fragment matches represents number of theoretical fragment ions that were successfully detected in the MS/MS spectrum, supporting structural confirmation.
f: it cannot be differentiated which isomer of the metabolite was formed.

## Sheet: Supplementary Table S3
Table S3 Predicted Protein Binding Alerts for eugenol, dihydroeugenol, p-phenylenediamine (PPD), toluene-2,5-diamine (PTD) and 2-methoxymethyl-PPD (ME-PPD) and their Myeloperoxidase-derived metabolites. The table summarizes parent compounds and experimentally identified metabolites with their sum formulas, postulated chemical structures, and SMILES codes. Protein‑binding, representing the first k…
Sum Formula	Chemical Name / Annotated MPO-derived Species	SMILES	Postulated Chemical Structure	Predicted Protein-Binding Alert without Metabolic Simulatora
C10H12O2	Eugenol	COc1cc(CC=C)ccc1O	#VALUE!	✖
C10H10O2	Eugenol - 2H	COC1=C\C(=C\C=C)\C=CC1=O	#VALUE!
C20H18O4	Eugenol Dimer - 2 H	COC1=C\C(=C/C=C)\C=C(C1=O)c2cc(CC=C)cc(OC)c2O	#VALUE!
C20H20O4	Eugenol Dimer	COc1cc(CC=C)cc(c1O)c2cc(CC=C)cc(OC)c2O	#VALUE!	✖
C10H14O2	Dihydroeugenol	CCCc1ccc(O)c(OC)c1	#VALUE!	✖
C10H12O2	Dihydroeugenol - 2H	CC\C=C\1/C=CC(=O)C(=C1)OC	#VALUE!
C20H24O4	Dihydroeugenol Dimer - 2 H	CCCc1cc(OC)c(O)c(c1)C2=C\C(=C\CC)\C=C(OC)C2=O	#VALUE!
C20H26O4	Dihydroeugenol Dimer	CCCc1cc(OC)c(O)c(c1)c2cc(CCC)cc(OC)c2O	#VALUE!	✖
C6H8N2	PPD	C1=CC(=CC=C1N)N	#VALUE!	✖
C18H18N6	PPD Trimer - 2H	NC1=C\C(=N/c2ccc(N)cc2)\C(=C/C/1=N\c3ccc(N)cc3)N	#VALUE!
C7H10N2	PTD	CC1=C(C=CC(=C1)N)N	#VALUE!	✖
C7H7NO2	PTD Monomer - NH2 + 2O	Cc1ccccc1[N](=O)[O-]	#VALUE!	✖
C14H15N3O	PTD Dimer - 2H - NH + O	CC1=C(C=CC(=C1)N=NC2=C(C=C(C=C2)O)C)N	#VALUE!	✖
C14H14N4	PTD Dimer - 4H	CC1=C\C(=N\C2=CC(=N)C(=CC2=N)C)\C=CC1=N	#VALUE!
		CC1=C\C(=N\N=C/2\C=CC(=N)C=C2C)\C=CC1=N	#VALUE!
C21H21N5O	Trimer - 4H - NH + O	CC1=C\C(=N/c2cc(N)c(\N=C\3/C=CC(=O)C(=C3)C)c(C)c2N)\C=CC1=N	#VALUE!
		CC1=C\C(=N\Nc2ccc(cc2C)\N=N\c3ccc(N)cc3C)\C=CC1=O	#VALUE!
C21H20N4O2	Trimer - 4H - 2NH + 2O	CC1=CC(=O)C=C/C/1=N\Nc2ccc(cc2C)\N=N\c3ccc(O)c(C)c3	#VALUE!
C14H14N2O	PTD Dimer - 2H - 2NH + O	CC1=C\C(=N\c2ccc(N)c(C)c2)\C=CC1=O	#VALUE!
C8H12N2O	ME-PPD	COCC1=C(C=CC(=C1)N)N	#VALUE!	✖
C8H9NO3	ME-PPD Monomer - NH2 + 2O	COCc1ccccc1[N](=O)[O-]	#VALUE!	✖
C24H27N5O4	ME-PPD Trimer - 2H - NH + O	COCC1=C\C(=N/c2cc(N)c(\N=C\3/C=CC(=O)C(=C3)COC)c(COC)c2N)\C=CC1=N	#VALUE!
		COCC1=C\C(=N\Nc2ccc(cc2COC)\N=N\c3ccc(N)cc3COC)\C=CC1=O	#VALUE!
a: Orange: predicted protein‑binding alert; Green and crossed: no protein‑binding alert

## Sheet: Supplementary Table S4
Table S4 Influence of structural isomerism of metabolites on predicted protein‑binding alerts. The table summarizes structural isomers of identified Myeloperoxidase-derived metabolites of eugenol and PPD, including their sum formulas, postulated chemical structures, and SMILES codes. Protein‑binding, representing the first key event of the skin sensitization adverse outcome pathway, were predicte…
Sum Formula	Chemical Name / Annotated MPO-derived Species	SMILES	Postulated Chemical Structure	Predicted Protein-Binding Alert without Metabolic Simulatora
C20H22O4	Eugenol Dimer	COc1cc(CC=C)cc(c1O)c2cc(CC=C)cc(OC)c2O	#VALUE!	✖
		COc1cc(CC=C)c(cc1O)c2cc(CC=C)cc(OC)c2O	#VALUE!	✖
		COc1cc(CC=C)c(cc1O)c2cc(O)c(OC)cc2CC=C	#VALUE!	✖
C18H18N6	PPD Trimer - 2H	NC1=CC(=Nc2ccc(N)cc2)C(=CC1=Nc3ccc(N)cc3)N	#VALUE!
		Nc1ccc(Nc2cc(ccc2N)\N=N\c3ccc(N)cc3)cc1	#VALUE!	✖
		Nc1ccc(Nc2cc(ccc2N)\N=N/c3ccc(N)cc3)cc1	#VALUE!	✖
		Nc1ccc(NNc2ccc(N)c(c2)N=C3C=CC(=N)C=C3)cc1	#VALUE!
		Nc1ccc(NNc2ccc(cc2)\N=N\c3ccc(N)cc3)cc1	#VALUE!	✖
		Nc1ccc(NNc2ccc(cc2)\N=N/c3ccc(N)cc3)cc1	#VALUE!	✖
a: Orange: predicted protein‑binding alert; Green and crossed: no protein‑binding alert
