# Supplementary material
Source: Research Square preprint supplement (doi:10.21203/rs.3.rs-10281038/v1)
Supplement: Supplementary file 2 [file db07465e3af1be4f59e48843.docx]

Archives of Toxicology

Supplementary Material for

Human Myeloperoxidase-Driven Activation of Skin Sensitizing *p*-Phenylenediamine-related Aromatic Diamines and Phenylpropanoids – Insights from In Chemico and In Silico Approaches

## Hannah Deusinger1,2 · Philipp Peslalz2 · Karma C. Fussell2 · Sabine Langhoff2 · Udo Bock3 · Carsten Goebel4 · Brunhilde Blömeke1

## Affiliations:

1. Department of Environmental Toxicology, Trier University, Trier, Germany
2. Wella Company, Darmstadt, Germany
3. Department of Environmental Toxicology, Analytical and Ecological Chemistry, Trier University, Trier, Germany
4. Wella Company, BBCG Toxicology & Safety Science Consulting GbR, Mörfelden-Walldorf, Germany

## Corresponding Author:

Brunhilde Blömeke; E-Mail address: bloemeke@uni-trier.de


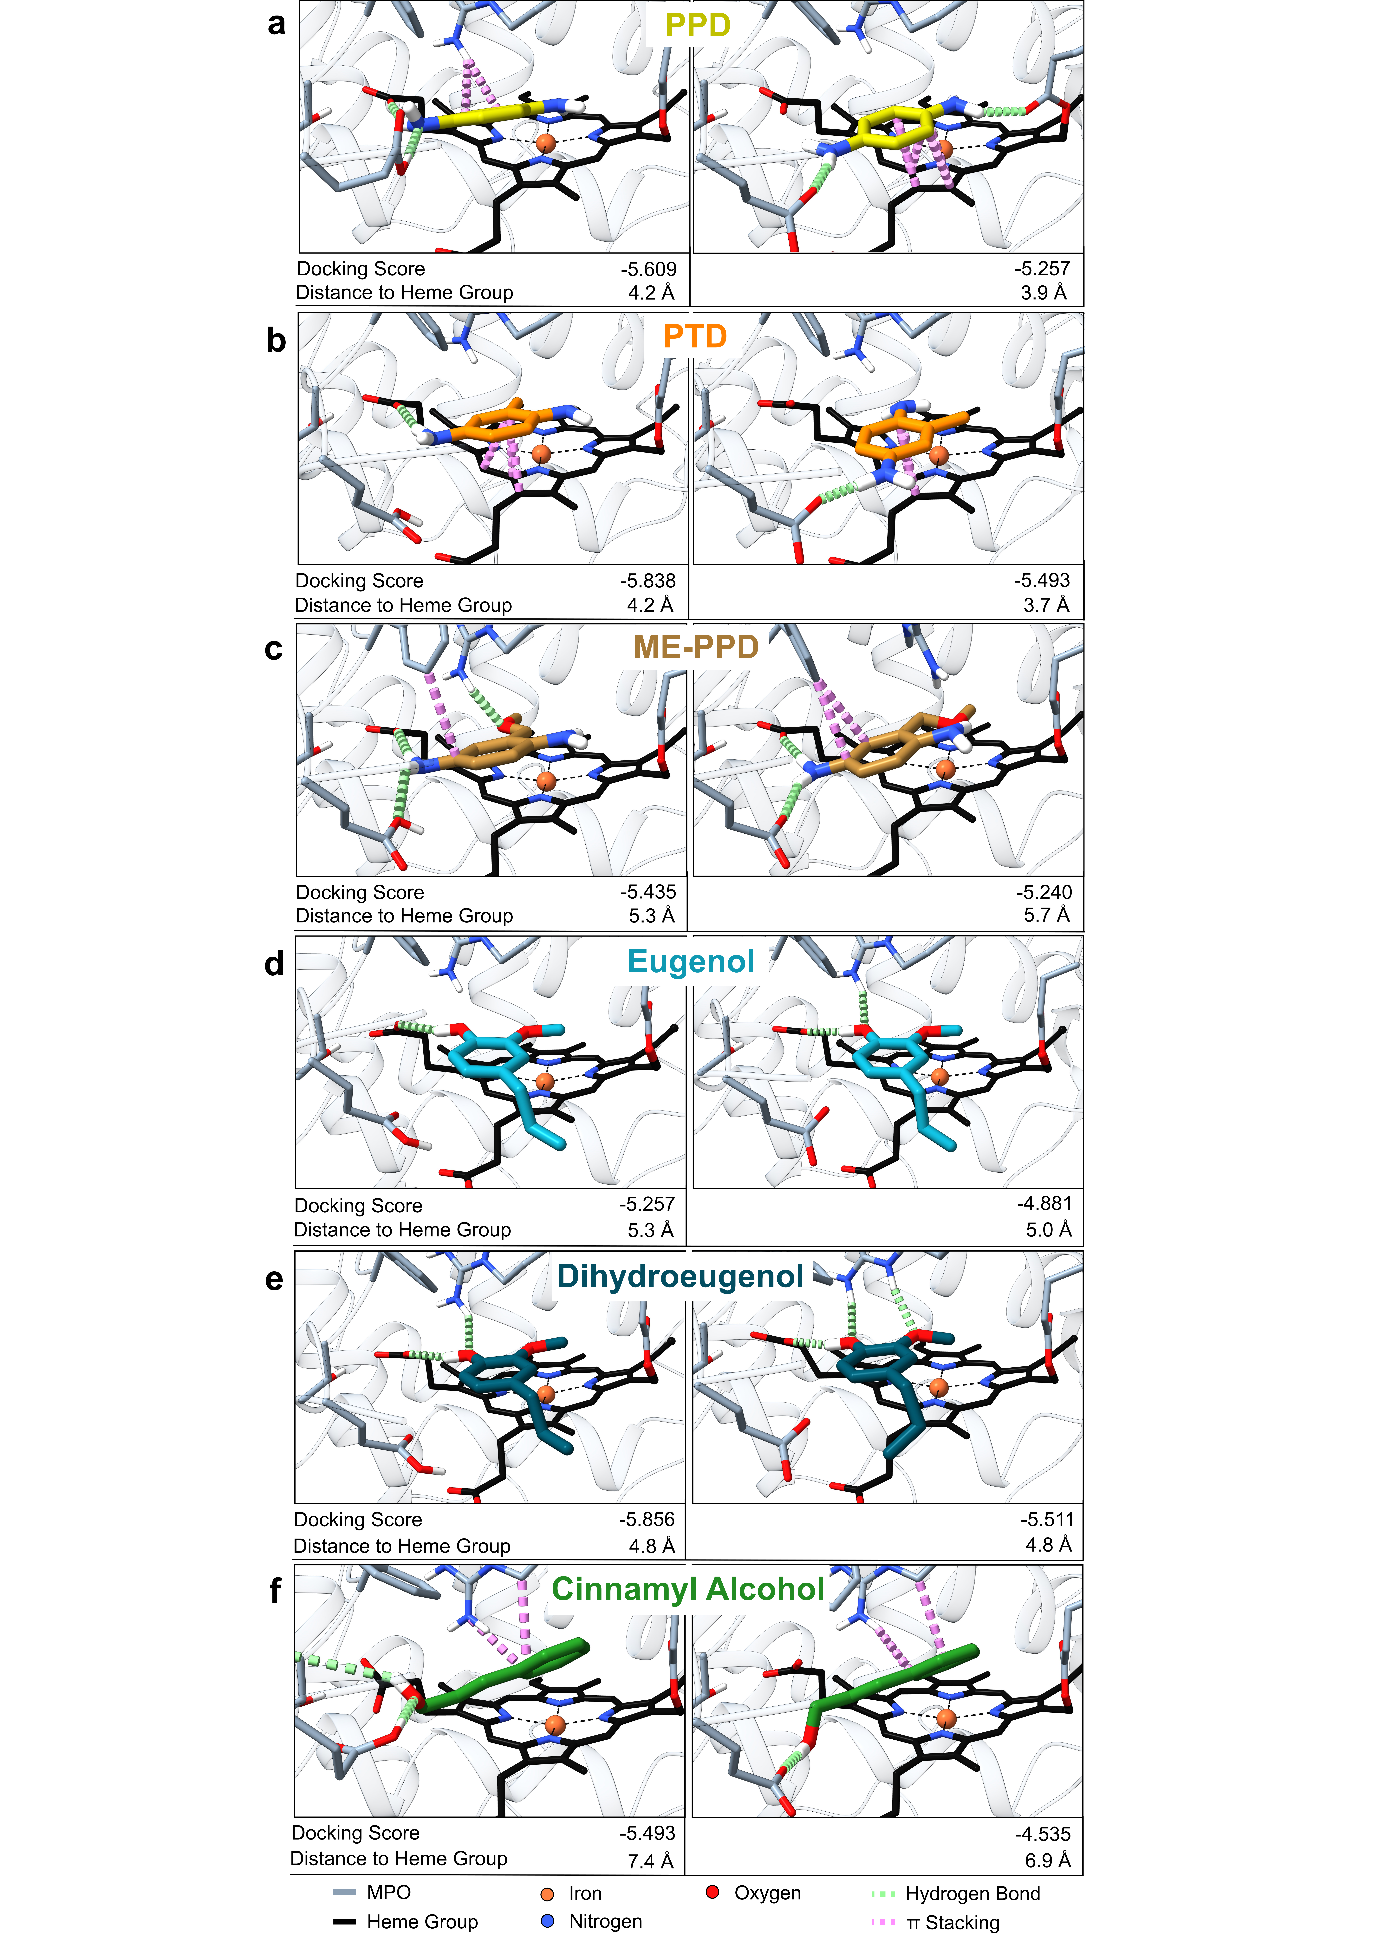


**Fig. S1** Molecular Docking Indicates Myeloperoxidase (MPO) can Enzymatically Convert *p*-Phenylenediamine(PPD)-related Aromatic Diamines and Phenylpropanoids, but Not Cinnamyl Alcohol. PPD (a, yellow), toluene-2,5-diamine (PTD, b, orange), 2-methoxymethyl-PPD (ME-PPD, c, brown), eugenol (d, turquoise), dihydroeugenol (e, dark turquoise) and cinnamyl alcohol (f, dark green), were each docked into both active sites of MPO using induced fit calculations. Interactions between the substrate and the proteins are marked as dotted lines (rose = π stacking, light green = hydrogen-bonding). Docking scores as well as the distance from the putative reactive heteroatom to the catalytic heme group (Å) were determined


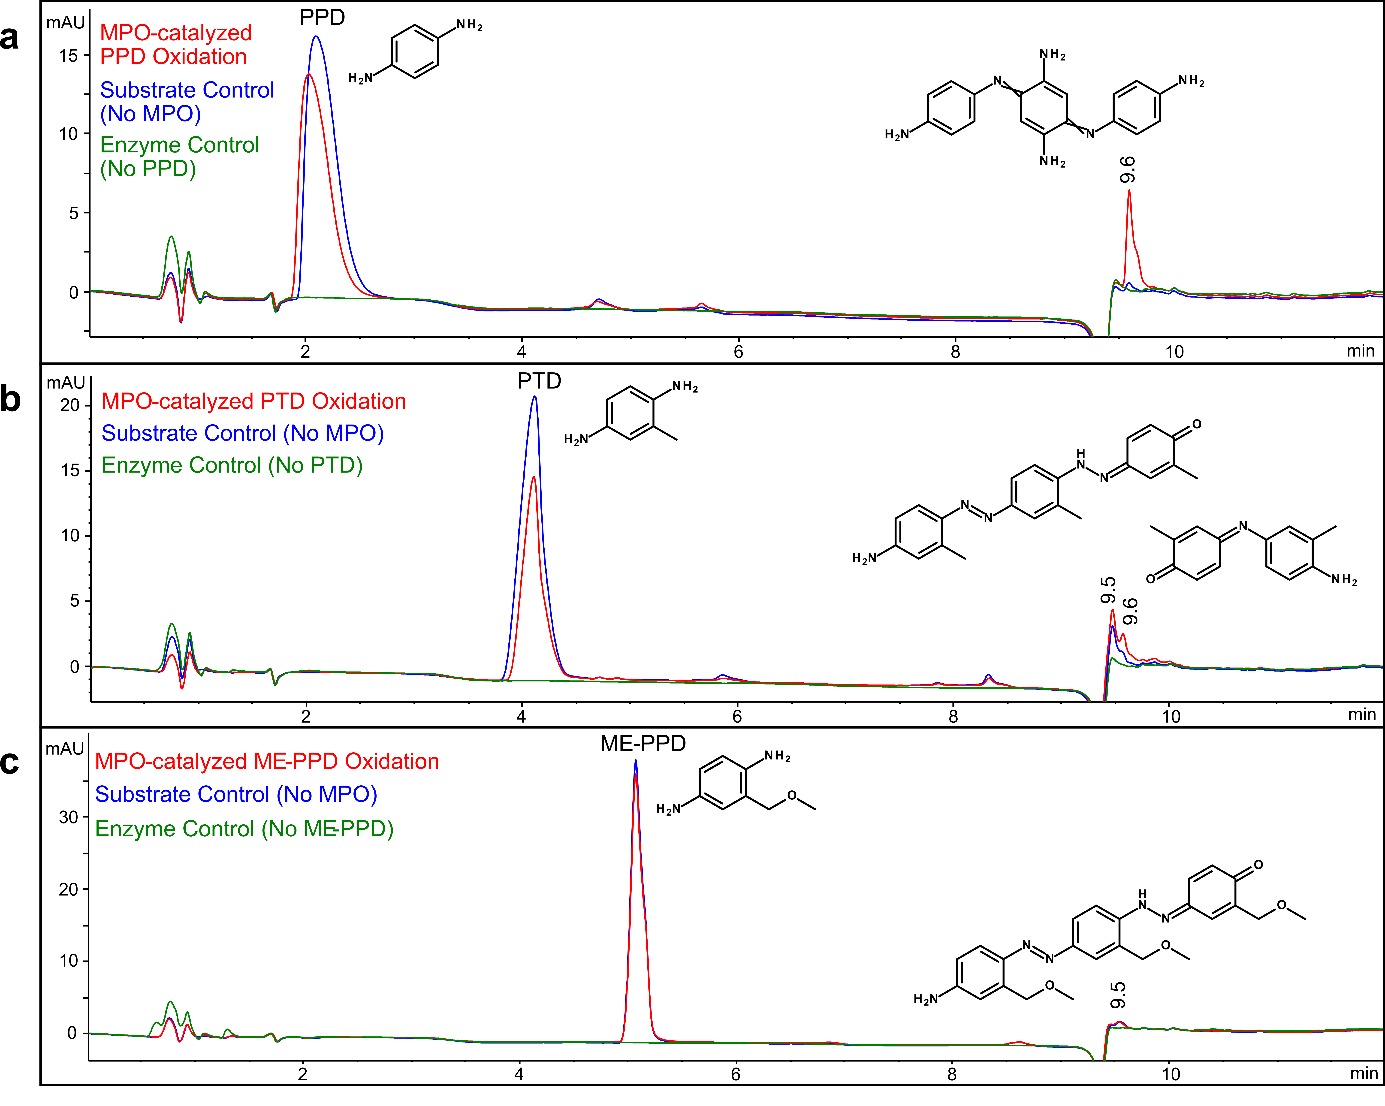


**Fig. S2** Myeloperoxidase (MPO)-Catalyzed Oxidation of the *p*-Phenylenediamine(PPD)-related Aromatic Diamines PPD (a), Toluene-2,5-Diamine (PTD, b) and 2-methoxymethyl-PPD (ME-PPD, c). HPLC‑UV chromatograms of PPD, PTD and ME-PPD incubated with MPO (red) display product peaks that are more intense than those observed under non‑enzymatic conditions (substrate controls, blue) and in enzyme controls (green), confirming substrate‑dependent product formation. Respective peaks are labeled with retention time and a postulated structure based on HR-MS results


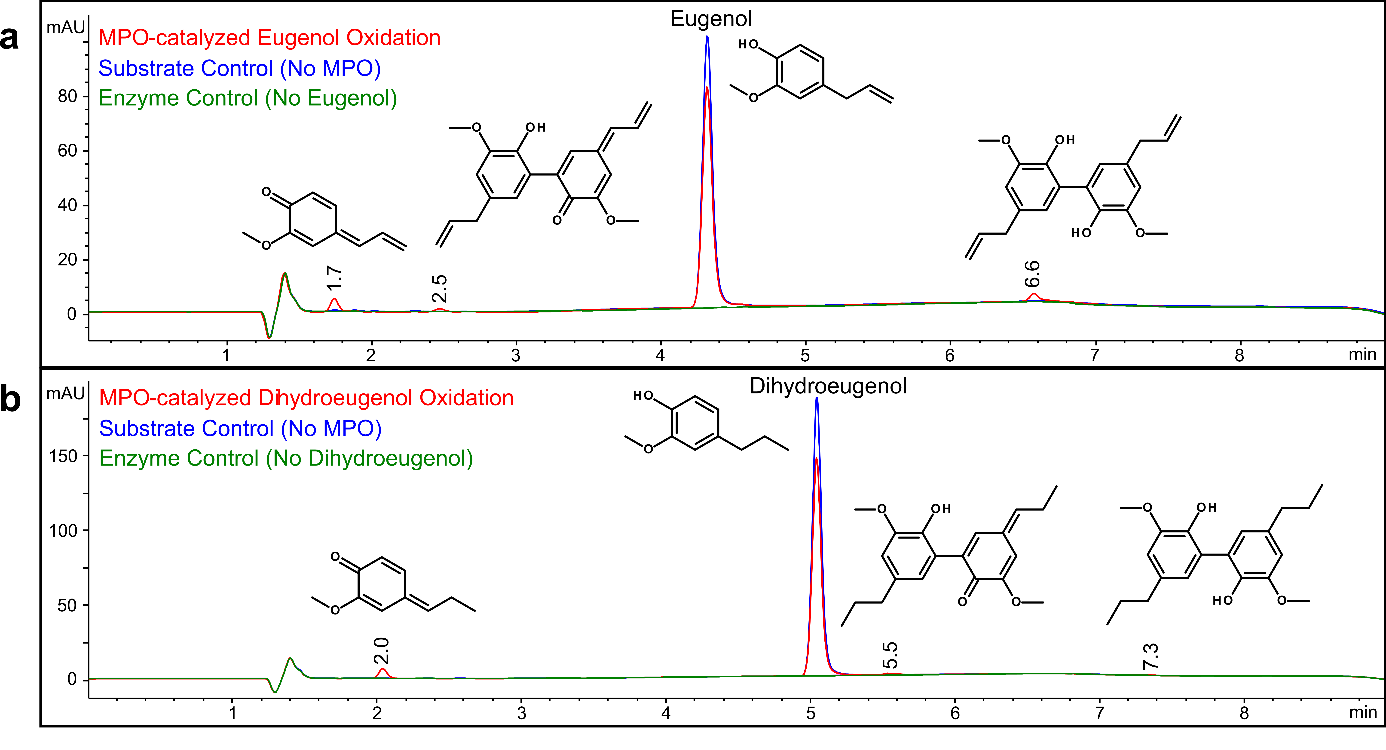


**Fig. S3** Myeloperoxidase (MPO)-Catalyzed Oxidation of the Phenylpropanoids Eugenol (a) and Dihydroeugenol (b). HPLC‑UV chromatograms of eugenol and dihydroeugenol incubated with MPO (red) show distinct product peaks that are absent in the substrate controls (blue) and enzyme controls (green), confirming MPO‑dependent oxidation. Newly formed peaks are labeled with retention time and a postulated structure based on HR-MS results


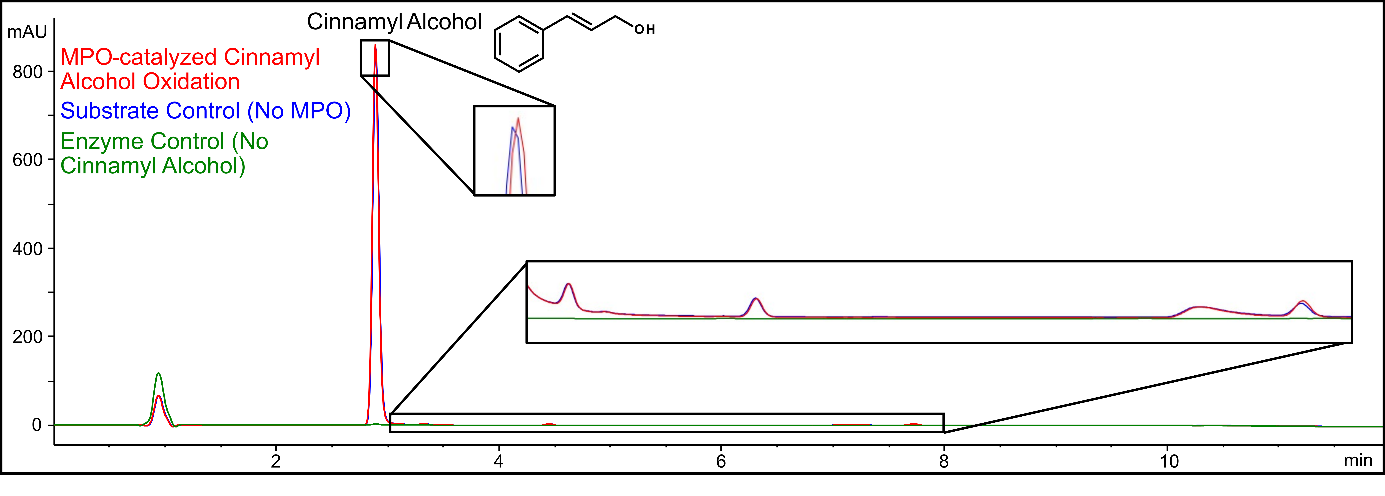


**Fig. S4** Cinnamyl Alcohol is Not Enzymatically Oxidized by Myeloperoxidase (MPO) under the Tested Conditions. HPLC‑UV chromatograms of cinnamyl alcohol incubated with MPO (red) show no additional product peaks compared with the substrate control (no MPO, blue) and enzyme control (no cinnamyl alcohol, green) as well as no decrease of peak intensity of cinnamyl alcohol, indicating an absence of MPO‑dependent turnover


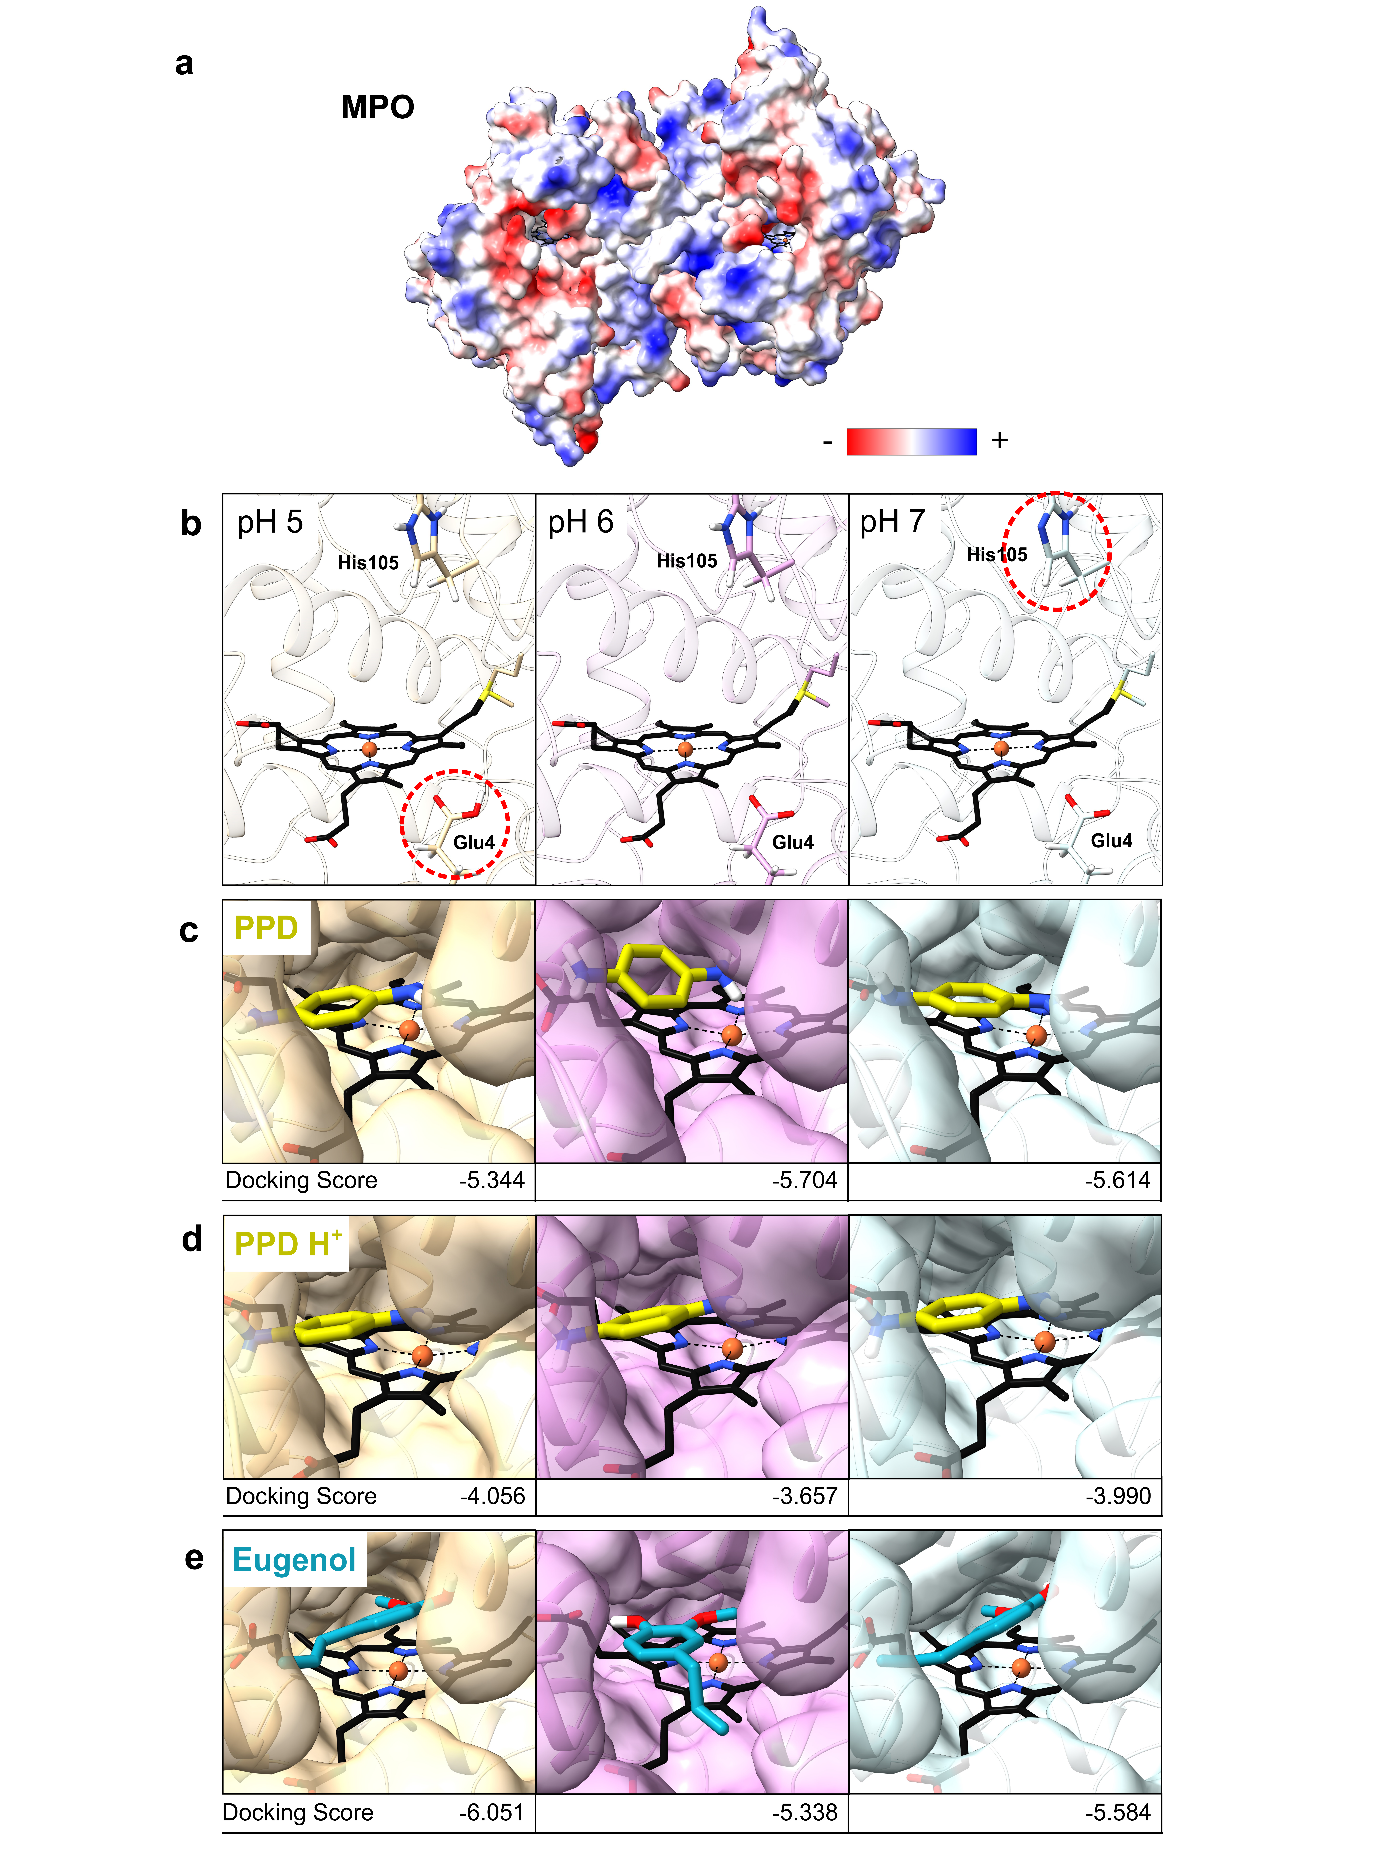


**Fig. S5** pH‑dependent Molecular Docking of *p*-Phenylenediamine and Eugenol in the Binding Pocket of Myeloperoxidase (MPO). The 3-dimensional structure of MPO colored by electrostatic potential (a, crystal structure obtained at pH 5.5, (Fiedler et al. 2000)) revealed the position of two identical binding pockets, each containing a heme group (black). pH‑dependent changes in the protonation state of amino acids were reflected in the binding pocket at pH 5, 6 and 7 (b). Induced fit docking of PPD (c, yellow), its protonated form of PPD (PPD H⁺, d, yellow) and eugenol (e, turquoise) across all pH conditions demonstrated that variations in pocket electrostatics had only minor effects on predicted binding affinity. In contrast, altering the charge state of the substrate itself had a pronounced impact, with protonated PPD exhibiting consistently less favorable docking scores compared with neutral PPD, while eugenol binding remained largely unchanged across pH conditions

# References

Fiedler TJ, Davey CA, Fenna RE (2000) X-ray crystal structure and characterization of halide-binding sites of human myeloperoxidase at 1.8 A resolution. J Biol Chem 275:11964-11971. <https://doi.org/10.1074/jbc.275.16.11964>
